# Supplementary material for: Whole-genome analysis of Escherichia coli isolated from wild Amur tiger (Panthera tigris altaica) and North China leopard (Panthera pardus japonensis)
Source: PeerJ. 2024 May 6;12:e17381. doi: 10.7717/peerj.17381 (PMC11080988; doi:10.7717/peerj.17381)
Supplement: Supplemental Information 1 [file peerj-12-17381-s001.xlsx]

## Sheet: Sheet1
Supplementary Table S1. Thirty-two isolated Escherichia coli strains with the basic information.
Sample name	Host	Sampling date	Isolation date	ST	SeroType
B1	Panthera pardus japonensis	2020.11	2020.12.3	126	Ont:H5
B2	Panthera pardus japonensis	2020.11	2020.12.3	69	O17/O44/O77:H18
B3	Panthera pardus japonensis	2020.11	2020.12.3	2079	O8:H19
B4	Panthera pardus japonensis	2020.11	2020.12.3	164	O20:H8
B5	Panthera pardus japonensis	2020.11	2020.12.3	1377	O8:H8
B6	Panthera pardus japonensis	2020.11	2020.12.3	58	O88:H21
B7	Panthera pardus japonensis	2020.11	2020.12.3	1380	O9/O158:H18
B8	Panthera pardus japonensis	2020.11	2020.12.3	126	Ont:H5
H1	Panthera tigris altaica	2012.1.14	2020.8.13	10	O1:H32
H2	Panthera tigris altaica	2012.1.14	2020.8.13	10	O1:H32
H3	Panthera tigris altaica	2014.1.8	2020.8.13	3246	O17/O44/O77:H46
H4	Panthera tigris altaica	2013.9.16	2020.8.13	7188	O74:H52
H5	Panthera tigris altaica	2013.4.4	2020.8.13	10	O1:H32
H6	Panthera tigris altaica	2012.12.18	2020.8.13	3246	O17/O44/O77:H46
H7	Panthera tigris altaica	2012.12.18	2020.8.13	10	O1:H32
H8	Panthera tigris altaica	2012.12.18	2020.8.13	939	O174:H23
H9	Panthera tigris altaica	2013.1.30	2020.8.13	4038	O93:H28
H10	Panthera tigris altaica	2014.1.12	2020.8.13	5418	Ont:H11
H11	Panthera tigris altaica	2013.1.22	2020.8.13	10	O1:H32
H12	Panthera tigris altaica	2015.12.24	2020.8.13	2715	O2/O50:H25
H13	Panthera tigris altaica	2014.1.8	2020.8.13	939	O174:H23
H14	Panthera tigris altaica	2015.1.26	2020.8.13	11910	Ont:H14
H15	Panthera tigris altaica	2015.1.29	2020.8.13	3246	O17/O44/O77:H46
H16	Panthera tigris altaica	2014.10.31	2020.8.13	939	O174:H23
H17	Panthera tigris altaica	2013.12.23	2020.8.13	939	O174:H23
H18	Panthera tigris altaica	2014.1.10	2020.8.13	58	O99:H21
H19	Panthera tigris altaica	2013.8.18	2020.8.13	1611	O125ab:H19
H20	Panthera tigris altaica	2013.4.8	2020.8.13	422	O17/O44/O77:H46
H21	Panthera tigris altaica	2015.1.31	2020.8.13	939	O174:H23
H22	Panthera tigris altaica	2013.9.17	2020.8.13	939	O174:H23
H23	Panthera tigris altaica	2013.9.16	2020.8.13	1378	O117:H14
H24	Panthera tigris altaica	2014.1.19	2020.8.13	939	O174:H23

## Sheet: Sheet2
name	MLST	SeroType
B1	126	Ont:H5
B2	69	O17/O44/O77:H18
B3	2079	O8:H19
B4	164	O20:H8
B5	1377	O8:H8
B6	58	O88:H21
B7	1380	O9/O158:H18
B8	126	Ont:H5
H1	10	O1:H32
H2	10	O1:H32
H3	3246	O17/O44/O77:H46
H4	7188	O74:H52
H5	10	O1:H32
H6	3246	O17/O44/O77:H46
H7	10	O1:H32
H8	939	O174:H23
H9	4038	O93:H28
H10	5418	Ont:H11
H11	10	O1:H32
H12	2715	O2/O50:H25
H13	939	O174:H23
H14	11910	Ont:H14
H15	3246	O17/O44/O77:H46
H16	939	O174:H23
H17	939	O174:H23
H18	58	O99:H21
H19	1611	O125ab:H19
H20	422	O17/O44/O77:H46
H21	939	O174:H23
H22	939	O174:H23
H23	1378	O117:H14
H24	939	O174:H23
reference	10	O16:H48
