# Supplementary material for: Whole-genome analysis of Escherichia coli isolated from wild Amur tiger (Panthera tigris altaica) and North China leopard (Panthera pardus japonensis)
Source: PeerJ. 2024 May 6;12:e17381. doi: 10.7717/peerj.17381 (PMC11080988; doi:10.7717/peerj.17381)
Supplement: Supplemental Information 2 [file peerj-12-17381-s002.xlsx]

## Sheet: Sheet1
Supplementary Table S2. Details of antimicrobial susceptibility test results for 32 Escherichia coli isolates.
Sample name	Imipenem	Tetracycline	Doxycycline	Ciprofloxacin	Norfloxacin
B1	R	S	S	S	S
B2	S	S	S	S	S
B3	S	S	S	S	S
B4	S	S	S	S	S
B5	S	S	S	S	S
B6	R	R	R	R	R
B7	I	S	S	S	S
B8	I	R	I	S	S
H1	I	S	S	S	S
H2	S	R	I	S	S
H3	S	R	S	S	S
H4	S	R	S	S	S
H5	S	R	S	I	S
H6	S	S	S	S	S
H7	I	S	S	S	S
H8	S	R	R	S	S
H9	I	R	S	S	S
H10	S	S	S	S	S
H11	S	S	S	S	S
H12	R	R	S	S	S
H13	R	S	S	S	S
H14	S	S	S	R	S
H15	S	R	S	S	S
H16	S	R	S	S	S
H17	I	I	S	S	S
H18	S	R	S	S	S
H19	I	I	S	S	S
H20	S	R	S	R	S
H21	I	I	S	S	S
H22	I	R	S	I	S
H23	S	S	S	I	I
H24	I	S	S	S	S
S,Susceptible I,Intermediate R,Resistance
