# Supplementary material for: Whole-genome analysis of Escherichia coli isolated from wild Amur tiger (Panthera tigris altaica) and North China leopard (Panthera pardus japonensis)
Source: PeerJ. 2024 May 6;12:e17381. doi: 10.7717/peerj.17381 (PMC11080988; doi:10.7717/peerj.17381)
Supplement: Supplemental Information 3 [file peerj-12-17381-s003.xlsx]

## Sheet: Sheet1
Supplementary Table S3. General genome features of 32 Escherichia coli strains.
Sample name	Contigs	Largest contig(bp)	Total length(bp)	GC(%)	N50(bp)	No of genes	No of rRNA	No of tRNA	Complete BUSCOs (C)	Complete and single-copy BUSCOs (S)	Complete and duplicated BUSCOs (D)
B1	102	531823	5159798	50.38	294465	4866	8	90	124(100%)	124(100%)	0
B2	197	397863	5477570	50.42	162452	5186	9	86	124(100%)	124(100%)	0
B3	77	549046	4978653	50.68	162607	4663	9	82	124(100%)	124(100%)	0
B4	83	491055	4780807	50.59	242335	4478	10	83	124(100%)	124(100%)	0
B5	32	734844	4773904	50.65	468975	4477	7	87	124(100%)	124(100%)	0
B6	118	352892	4823794	50.67	185372	4496	9	82	124(100%)	124(100%)	0
B7	53	542505	5235470	50.45	341155	4850	8	81	124(100%)	124(100%)	0
B8	115	531644	5179698	50.41	294465	4905	8	90	124(100%)	124(100%)	0
H1	68	444758	4642835	50.6	178643	4305	11	83	124(100%)	124(100%)	0
H2	68	341372	4638104	50.6	161543	4295	9	83	124(100%)	124(100%)	0
H3	83	829074	5263454	50.41	197846	4946	11	92	124(100%)	124(100%)	0
H4	141	269375	4524330	50.89	73931	4246	8	84	124(100%)	124(100%)	0
H5	71	341411	4638687	50.61	173272	4296	9	83	124(100%)	124(100%)	0
H6	85	829118	5264113	50.41	164384	4944	8	92	124(100%)	124(100%)	0
H7	72	444758	4643181	50.61	210522	4315	9	83	124(100%)	124(100%)	0
H8	40	1124564	4703060	50.93	409182	4343	9	84	124(100%)	124(100%)	0
H9	55	432559	4653790	50.83	192737	4320	9	80	124(100%)	124(100%)	0
H10	144	196261	4843186	50.82	89529	4542	11	87	124(100%)	124(100%)	0
H11	70	390192	4638414	50.6	165677	4300	9	83	124(100%)	124(100%)	0
H12	171	254466	5374857	50.17	133026	5112	9	95	124(100%)	124(100%)	0
H13	41	1124715	4704256	50.93	734653	4341	13	83	124(100%)	124(100%)	0
H14	88	862704	4774105	50.84	513778	4455	8	85	124(100%)	124(100%)	0
H15	85	829074	5263982	50.4	181783	4948	8	92	124(100%)	124(100%)	0
H16	42	1124426	4704300	50.93	570154	4342	12	84	124(100%)	124(100%)	0
H17	40	1125521	4745861	50.88	734653	4390	10	83	124(100%)	124(100%)	0
H18	79	349328	4864168	50.49	193156	4535	9	83	124(100%)	124(100%)	0
H19	203	484726	5210009	50.62	183091	5021	12	86	124(100%)	122(98.4%)	2(1.6%)
H20	134	596208	5361482	50.33	173189	5043	12	91	124(100%)	123(99.2%)	1(0.8%)
H21	43	734735	4704171	50.93	252591	4341	10	84	124(100%)	124(100%)	0
H22	40	734646	4703633	50.93	408599	4343	11	83	124(100%)	124(100%)	0
H23	36	700261	4861854	50.62	407955	4425	9	81	124(100%)	124(100%)	0
H24	43	801190	4704191	50.93	471268	4343	10	83	124(100%)	124(100%)	0
