# Supplementary material for: Whole-genome analysis of Escherichia coli isolated from wild Amur tiger (Panthera tigris altaica) and North China leopard (Panthera pardus japonensis)
Source: PeerJ. 2024 May 6;12:e17381. doi: 10.7717/peerj.17381 (PMC11080988; doi:10.7717/peerj.17381)
Supplement: Supplemental Information 4 [file peerj-12-17381-s004.xlsx]

## Sheet: Sheet1
Supplementary Table S4. Differential SNP values for each strain.
	B1	B2	B3	B4	B5	B6	B7	B8	H10	H11	H12	H13	H14	H15	H16	H17	H18	H19	H1	H20	H21	H22	H23	H24	H2	H3	H4	H5	H6	H7	H8	H9	reference
B1	0	47800	46314	46355	46458	46387	48636	42	46240	41153	59699	46330	46301	47836	46332	46333	46432	46413	41152	47727	46329	46336	47415	46337	41152	47834	45689	41153	47832	41150	46330	46329	40085
B2	47800	0	41204	41157	41415	41261	39342	47796	41241	37136	53445	41267	41206	21739	41267	41270	41318	41167	37135	21837	41266	41271	42214	41274	37135	21737	40871	37134	21737	37133	41267	41254	36302
B3	46314	41204	0	13630	15444	13284	39553	46306	17467	22236	53277	15369	13948	41373	15373	15374	13592	13500	22232	41101	15369	15379	32068	15376	22233	41371	23946	22234	41371	22231	15370	13622	21976
B4	46355	41157	13630	0	15697	12534	39460	46347	17695	22562	53299	14520	13548	41313	14522	14523	12549	11683	22561	41041	14519	14528	32075	14527	22561	41311	24174	22560	41311	22559	14520	12150	22302
B5	46458	41415	15444	15697	0	15304	39665	46450	18392	22558	53260	16544	14695	41631	16546	16547	15375	15641	22558	41373	16547	16556	32218	16551	22558	41627	23786	22558	41629	22556	16546	15650	22315
B6	46387	41261	13284	12534	15304	0	39610	46381	17291	22611	53428	14158	12790	41422	14160	14161	2377	12441	22609	41177	14160	14172	32253	14167	22608	41418	24320	22609	41420	22608	14161	12510	22372
B7	48636	39342	39553	39460	39665	39610	0	48627	39648	35435	55700	39430	39491	39537	39432	39433	39691	39566	35434	39448	39429	39437	40202	39436	35434	39534	39169	35435	39534	35432	39430	39590	34715
B8	42	47796	46306	46347	46450	46381	48627	0	46230	41141	59692	46324	46295	47827	46326	46327	46426	46403	41142	47718	46323	46328	47408	46329	41142	47825	45679	41141	47823	41140	46324	46321	40075
H10	46240	41241	17467	17695	18392	17291	39648	46230	0	22258	53104	18869	17711	41423	18871	18872	17369	17376	22257	41180	18870	18877	32163	18876	22257	41421	23597	22256	41421	22255	18869	17531	21953
H11	41153	37136	22236	22562	22558	22611	35435	41141	22258	0	45853	22501	22533	37208	22503	22503	22766	22605	9	36790	22502	22507	28694	22506	7	37206	18579	8	37206	7	22501	22645	3595
H12	59699	53445	53277	53299	53260	53428	55700	59692	53104	45853	0	53234	53196	53338	53234	53237	53480	53349	45851	53191	53235	53244	55256	53243	45851	53334	52067	45852	53336	45850	53237	53357	44484
H13	46330	41267	15369	14520	16544	14158	39430	46324	18869	22501	53234	0	13302	41283	4	5	14332	14481	22498	41011	7	14	32106	9	22500	41279	24037	22501	41281	22496	6	14597	22230
H14	46301	41206	13948	13548	14695	12790	39491	46295	17711	22533	53196	13302	0	41414	13302	13305	12858	13564	22532	41162	13305	13316	31999	13311	22532	41410	24075	22533	41412	22530	13306	13443	22253
H15	47836	21739	41373	41313	41631	41422	39537	47827	41423	37208	53338	41283	41414	0	41285	41286	41406	41332	37207	456	41282	41285	42462	41283	37206	11	41050	37208	9	37205	41283	41414	36390
H16	46332	41267	15373	14522	16546	14160	39432	46326	18871	22503	53234	4	13302	41285	0	7	14336	14485	22502	41013	9	16	32108	13	22502	41281	24039	22503	41283	22500	8	14601	22232
H17	46333	41270	15374	14523	16547	14161	39433	46327	18872	22503	53237	5	13305	41286	7	0	14337	14486	22503	41014	10	19	32111	14	22502	41282	24040	22504	41284	22501	9	14602	22233
H18	46432	41318	13592	12549	15375	2377	39691	46426	17369	22766	53480	14332	12858	41406	14336	14337	0	12626	22763	41163	14339	14346	32287	14341	22765	41402	24362	22766	41404	22761	14338	12811	22407
H19	46413	41167	13500	11683	15641	12441	39566	46403	17376	22605	53349	14481	13564	41332	14485	14486	12626	0	22602	41060	14486	14493	32153	14490	22604	41328	24090	22603	41330	22600	14487	12218	22321
H1	41152	37135	22232	22561	22558	22609	35434	41142	22257	9	45851	22498	22532	37207	22502	22503	22763	22602	0	36789	22500	22504	28691	22505	7	37205	18578	8	37205	4	22498	22642	3594
H20	47727	21837	41101	41041	41373	41177	39448	47718	41180	36790	53191	41011	41162	456	41013	41014	41163	41060	36789	0	41010	41021	42253	41018	36789	455	40752	36790	453	36787	41011	41156	35945
H21	46329	41266	15369	14519	16547	14160	39429	46323	18870	22502	53235	7	13305	41282	9	10	14339	14486	22500	41010	0	15	32109	14	22500	41280	24036	22501	41280	22499	6	14598	22233
H22	46336	41271	15379	14528	16556	14172	39437	46328	18877	22507	53244	14	13316	41285	16	19	14346	14493	22504	41021	15	0	32114	13	22506	41283	24041	22505	41283	22502	16	14606	22240
H23	47415	42214	32068	32075	32218	32253	40202	47408	32163	28694	55256	32106	31999	42462	32108	32111	32287	32153	28691	42253	32109	32114	0	32113	28693	42460	30720	28692	42460	28689	32110	32184	28057
H24	46337	41274	15376	14527	16551	14167	39436	46329	18876	22506	53243	9	13311	41283	13	14	14341	14490	22505	41018	14	13	32113	0	22507	41280	24044	22508	41282	22503	11	14602	22239
H2	41152	37135	22233	22561	22558	22608	35434	41142	22257	7	45851	22500	22532	37206	22502	22502	22765	22604	7	36789	22500	22506	28693	22507	0	37205	18578	7	37205	6	22499	22644	3594
H3	47834	21737	41371	41311	41627	41418	39534	47825	41421	37206	53334	41279	41410	11	41281	41282	41402	41328	37205	455	41280	41283	42460	41280	37205	0	41050	37206	8	37203	41281	41412	36386
H4	45689	40871	23946	24174	23786	24320	39169	45679	23597	18579	52067	24037	24075	41050	24039	24040	24362	24090	18578	40752	24036	24041	30720	24044	18578	41050	0	18577	41048	18576	24037	24203	18636
H5	41153	37134	22234	22560	22558	22609	35435	41141	22256	8	45852	22501	22533	37208	22503	22504	22766	22603	8	36790	22501	22505	28692	22508	7	37206	18577	0	37206	7	22500	22645	3595
H6	47832	21737	41371	41311	41629	41420	39534	47823	41421	37206	53336	41281	41412	9	41283	41284	41404	41330	37205	453	41280	41283	42460	41282	37205	8	41048	37206	0	37203	41281	41412	36388
H7	41150	37133	22231	22559	22556	22608	35432	41140	22255	7	45850	22496	22530	37205	22500	22501	22761	22600	4	36787	22499	22502	28689	22503	6	37203	18576	7	37203	0	22498	22640	3592
H8	46330	41267	15370	14520	16546	14161	39430	46324	18869	22501	53237	6	13306	41283	8	9	14338	14487	22498	41011	6	16	32110	11	22499	41281	24037	22500	41281	22498	0	14597	22234
H9	46329	41254	13622	12150	15650	12510	39590	46321	17531	22645	53357	14597	13443	41414	14601	14602	12811	12218	22642	41156	14598	14606	32184	14602	22644	41412	24203	22645	41412	22640	14597	0	22437
reference	40085	36302	21976	22302	22315	22372	34715	40075	21953	3595	44484	22230	22253	36390	22232	22233	22407	22321	3594	35945	22233	22240	28057	22239	3594	36386	18636	3595	36388	3592	22234	22437	0
